1           ***Bicaudal C* is required for the function of the follicular epithelium**  
2                                   **during oogenesis in *Rhodnius prolixus*.**

3           Agustina Pascual<sup>1</sup>, Emiliano S. Vilaro<sup>2</sup>, Catalina Taibo<sup>3</sup>, Julia Sabio y  
4                                   García<sup>3</sup>, Rolando Rivera Pomar<sup>1,2</sup>

5           <sup>1</sup> Centro de Bioinvestigaciones - CITNOBA (UNNOBA, Pergamino)

6           <sup>2</sup> Centro Regional de Estudios Genómicos (Facultad de Ciencias Exactas,  
7 UNLP, La Plata).

8           <sup>3</sup> Laboratorio de Microscopia Integral (LIM), (CICVyA, INTA, Hurlingham)

9  
10          **Abstract**

11          The morphology and physiology of the oogenesis have been well studied in  
12 the vector of Chagas disease *Rhodnius prolixus*. However, the molecular  
13 interactions that regulate the process of egg formation, key for the reproductive  
14 cycle of the vector, is still largely unknown. In order to understand the molecular  
15 and cellular basis of the oogenesis we examined the function of the gene  
16 *Bicaudal C* (*BicC*) during oogenesis and early development of *R. prolixus*. We  
17 show that *R. prolixus BicC* (*Rp-BicC*) gene is expressed in the germarium, with  
18 cytoplasmic distribution, as well as in the follicular epithelium of the developing  
19 oocytes. RNAi silencing of *Rp-BicC* resulted in sterile females that lay few, small,  
20 non-viable eggs. The ovaries are reduced in size and show a disarray of the  
21 follicular epithelium. This indicates that *Rp-BicC* has a central role in the  
22 regulation of oogenesis. Although the follicular cells are able to form the chorion,  
23 the uptake of vitelline by the oocytes is compromised. We show evidence that the  
24 polarity of the follicular epithelium and the endocytic pathway, which is crucial for  
25 the proper yolk deposition, are affected. This study provides insights into the  
26 molecular mechanisms underlying oocyte development and show that *Rp-BicC*  
27 is important for the development of the egg and, therefore, a key player in the  
28 reproduction of this Chagas disease vector.

29  
30          **Author summary**

31          The oogenesis is the process of egg formation. It is essential to guarantee  
32 transgenerational inheritance. It implies the differentiation of the gamete (oocyte)  
33 from a niche of stem cells in the germ line, the accumulation of yolk, and the  
34 formation of the chorion. These events are entangled in a regulated manner by

35 the concerted communication between the different cell types that form the ovary.  
36 It is regulated by endogenous gene networks and linked to the physiological state  
37 of the insect by hormonal clues. This timely orchestrated process represents the  
38 interaction of gene networks. The genetic regulation behind the oogenesis is  
39 largely unknown in *Rhodnius prolixus*. Here we identified a gene required for egg  
40 formation that interferes the uptake of the yolk by affecting the functional integrity  
41 of the follicular epithelium. Our results are of interest for a better understanding  
42 of a complex process essential for the survival of vector populations and provide  
43 knowledge to envisage and design new strategies for vector control.

44  
45

## 46 **Introduction**

47 *Rhodnius prolixus*, is a hematophagous insect and, like other triatomines, is  
48 the vector of *Trypanosoma cruzi*, the agent of Chagas disease [1,2]. Chagas  
49 disease is a life-threatening disease affecting millions of people worldwide [3]. As  
50 vaccine are unavailable and disease treatment is unsafe, vector control is still the  
51 most useful method to control the illness. In this context, as oogenesis is crucial  
52 for embryo viability and population dynamics, molecular investigation on this  
53 process could represent an interesting target to develop novel strategies for  
54 insect population control [4,5].

55 In addition to the sanitary relevance, *R. prolixus* has been a classical model of  
56 physiology since the pioneer studies of Sir Vincent Wigglesworth [6-9] and, to  
57 some extent, an emerging model for developmental biology [10-12]. The genome  
58 of *R. prolixus* has been sequenced [13] and several tissue-specific  
59 transcriptomes have been reported [14,15], providing a solid foundation for gene  
60 identification. The development of molecular tools such as parental RNA  
61 interference (RNAi) [11] set the ground for functional analysis.

62 The formation of the egg, namely oogenesis, is a period of rapid cellular growth  
63 and differentiation which is triggered by feeding. The oogenesis implies the  
64 differentiation of the oocyte from a niche of stem cells in the germ line, the  
65 accumulation of yolk, formation of the chorion, and the establishment of the future  
66 embryo axes. These events are entangled in a regulated manner by means of  
67 the communication between the different cell types that compose the ovary,  
68 hormonal signaling, that modulate the action of gene networks [16]. Insect ovaries

69 are classified into three distinct types: panoistic, polytrophic and telotrophic,  
70 based on the morphology of germ cells in the mature ovary [17-21]. The  
71 morphology and architecture of the ovaries have been studied in a variety of  
72 insects [4,21-27], but the complete regulatory profiles of gene expression have  
73 only been determined in *Drosophila melanogaster* [28-33].

74 The adult females of *R. prolixus* have two ovaries, each one made up of seven  
75 ovarioles [34]. The ovaries are telotrophic, in which nurse cells are confined to a  
76 distal chamber referred to as the trophic chamber or tropharium, separated from  
77 the vitellarium, structure in which oocytes go through the different stages of  
78 oogenesis, previtellogenesis, vitellogenesis and choriogenesis, accompanied by  
79 the follicular epithelium [26,35]. The trophic chamber produces maternal RNAs  
80 and nutrients, which are transported to the developing oocyte through tubular  
81 bridges -the trophic cords, in a directional transport mediated by a network of  
82 microtubules [36,37]. The accompanying follicle cells shows dramatic  
83 morphological and physiological changes during the different stages of  
84 oogenesis, but they always keep an organized pattern [26]. Together with the fat  
85 body, the ovaries are responsible for the synthesis of vitellogenin (Vg), precursor  
86 of vitellin (Vn), the main component of egg yolk [38,39]. Later on, follicle cells  
87 produce the outermost layer of the egg, the chorion, which protects egg from  
88 dehydration and regulates oxygen intake and fertilization [40]. Despite the  
89 detailed studies [41], we still lack information about the gene networks involved  
90 in *R. prolixus* oogenesis.

91 Many orthologues of the genes involved in *D. melanogaster* oogenesis has  
92 been identified in *R. prolixus* [13,14,42]. One of this was *Bicaudal C (BicC)*. *BicC*  
93 was originally identified in a *D. melanogaster* maternal mutagenesis screen [43-  
94 45]. Females heterozygous for *BicC* mutations produce embryos of several  
95 different phenotypic classes, including bicaudal embryos that consist only of a  
96 mirror-image duplication of 2–4 posterior segments. Homozygous *BicC* females  
97 are sterile because the centripetal follicle cells fail to migrate over the anterior  
98 surface of the oocyte at stage 10 during *D. melanogaster* oogenesis [44-46]. *BicC*  
99 encodes a protein with hnRNP K homology (KH) and sterile alpha motif (SAM)  
100 domains [46], both RNA-binding motifs [47-49]; that interacts with other proteins  
101 related to RNA metabolism and targets mRNAs to form regulatory

102 ribonucleoprotein complexes [50]. Also, it has been reported to be involved in the  
103 function of Malpighian tubules in the adults [51].

104 Here, we report the function of *Bicaudal C* (*Rp-BicC*) during oogenesis of *R.*  
105 *prolixus*. We identified the expression of *BicC* gene and carried out parental RNAi  
106 experiments. Our results show that *Rp-BicC* is required for the proper follicle cell  
107 function in early stages of oogenesis, affecting yolk uptake, but not choriogenesis.

108

## 109 **Materials and methods**

### 110 **Insect husbandry**

111 A colony of *Rhodnius prolixus* was maintained in our insectarium of the Centro  
112 de Bioinvestigaciones (CeBio) in plastic jars containing strips of paper at 28°C  
113 and 80% relative humidity in controlled environment incubators with a 12h  
114 light/dark cycle. In this condition, embryogenesis takes 14 ± 1 days. Insects were  
115 regularly fed on chicken, *ad libitum*, which were housed, cared, fed and handled  
116 in accordance with resolution 1047/2005 (National Council of Scientific and  
117 Technical Research, CONICET) regarding the national reference ethical  
118 framework for biomedical research with laboratory, farm, and nature collected  
119 animals, which is in accordance with the international standard procedures of the  
120 Office for Laboratory Animal Welfare, Department of Health and Human Services,  
121 NIH and the recommendations established by the 2010/63/EU Directive of the  
122 European Parliament, related to the protection of animals used for scientific  
123 purposes. Biosecurity rules fulfill CONICET resolution 1619/2008, which is in  
124 accordance with the WHO Biosecurity Handbook (ISBN 92 4 354 6503).

### 125 **Identification of the *BicC* transcript and cDNA synthesis**

126 The transcript was identified by local BLASTX search using the *D.*  
127 *melanogaster* orthologue gene as query on a transcriptome from ovary and  
128 different early embryonic stages assembled using the annotated genome of *R.*  
129 *prolixus* as reference (VectorBase, RproC3 version; Pascual and Rivera Pomar  
130 unpublished data). RNA, was isolated from *R. prolixus* embryos at different pre-  
131 gastrulation developmental times using TRIZOL reagent (Invitrogen). cDNA was  
132 synthesized using kit SuperScript™ VILO™ MasterMix (Invitrogen) and used as  
133 template for PCR. Specific primers for *Rp-BicC* were designed [52,53] to amplify  
134 two different regions within the KH domain *Rp-BicC*<sup>1</sup> (237 bp): sense-1 5'-  
135 CAAGGCACGTCAACAGCTAA-3', antisense-1 5'-

136 GGATCGTTAGGAGCGATCAA-3'; and *Rp-BicC<sup>2</sup>* (291 bp): sense-2 5'-  
137 CGACTCAAACCTTGGTGCAAA-3', antisense-2 5'-  
138 AACTTCGCCAGCGATAGAAA-3'. The reaction conditions were 5 min at 94°C,  
139 followed by 35 cycles of 30 seconds (s) at 94°C, 30 s at 60°C and 35 s at 72°C  
140 and a final extension of 5 min at 72°C. Amplicons were separated in 1% agarose  
141 gels, and sequenced to confirm identity (Macrogen Inc.). In addition, the same  
142 primers were designed containing T7 promoter sequence  
143 (CGACTCACTATAGGG) at the 5' end for use for *in vitro* transcription of dsRNA  
144 or antisense RNA probes.

#### 145 **Ovary and embryo manipulation**

146 Control and silenced adult females were fed to induce oogenesis and five days  
147 later the ovaries were dissected in Phosphate Buffered Saline (PBS 1X). Ovaries  
148 were fixed in different ways depending on the subsequent analysis. For confocal  
149 microscopy, the fixation was performed on ice in 4% paraformaldehyde (PFA) in  
150 PBT (PBS 1X + 0.1% Tween-20) for 30 minutes (min), then washed three times  
151 in PBT and stored at 4°C until staining the nuclei with Hoescht (Sigma-Aldrich,  
152 USA, 1 µg/ml). Images were acquired with the Zeiss LSM 800 confocal  
153 microscope. For light microscopy ovaries were fixed in formaldehyde 4%, washed  
154 with Millonig's buffer, dehydrated in graded series of ethanol (70%, 96%, 100%)  
155 and xylene (100%) and embedded in paraffin [54]. 5 µm thick sections were cut  
156 in a rotary microtome (Leica) and stained using standard hematoxylin-eosin  
157 procedure, mounted and photographed using an A1 ZEISS microscope. For  
158 transmission electron microscopy (TEM), the protocol was modified from  
159 Huebner and Anderson [55]. Ovaries were fixed in glutaraldehyde 2.5% and post-  
160 fixed in 1% osmium tetroxide in Millonig's buffer at pH 7.4. This was followed by  
161 dehydration in a graded series of ethanol (25%, 30%, 50%, 80%, 90%) and  
162 acetone (100%), after which the ovaries were infiltrated and embedded in epoxy  
163 resin (Durcupan ACM, Fluka AG, Switzerland). Ultrathin sections (~60 nm) were  
164 cut with a diamond knife, stained with aqueous uranyl acetate and Reynold's lead  
165 citrate [56], and examined at 80 kV in a MET JEOL 1200 EXII transmission  
166 electron microscope.

167 For the analysis of lipids and membranes distribution, lipophilic styryl dye FM  
168 4-64FX (Thermo Fisher Scientific) was injected in the body cavity of females in a  
169 1:500 dilution (3 µg/µl) in PBS 1X and let to diffuse for 20 min. FM 4-64FX targets

170 plasma membrane and marks exo/endocytosis hot spots in the cells [57]. For the  
171 dextran oocyte uptake analysis, 2  $\mu$ l of Texas Red-conjugated dextran (10.000  
172 MW; Molecular probes, Thermo Fisher Scientific) was injected between  
173 abdominal tergites in the hemocoel of females 4 days after blood meal and  
174 incubated 24 h. After the corresponding time, ovaries were dissected and fixed  
175 as described above for confocal microscopy and images were acquired in a Zeiss  
176 LSM 800 confocal microscope.

177 Eggs collected from individual females were used for scanning electron  
178 microscopy (SEM), fixed in glutaraldehyde 2.5%, washed with Millonig's buffer,  
179 dehydrated in a graded series of ethanol (70%, 96%, 100%), mounted with  
180 double-sided adhesive carbon tape on metallic stubs, metallized with gold and  
181 observed under a SEM Quanta 250 (FEI) operated at 20 kV [58].

### 182 **Fluorescent immunohistochemistry**

183 Ovaries were fixed for confocal microscopy, then washed in PBX (0.1% Triton  
184 X-100 in PBS), blocked with 5% normal goat serum for 2 h, and incubated  
185 overnight at 4°C with 1:200 dilution of rabbit polyclonal anti-vitellin antibody  
186 (gamma-globulin fraction) [59,60]. After extensive washing, the ovaries were  
187 incubated for 2 h at room temperature with secondary Alexa 568-conjugated anti-  
188 rabbit IgG (1:500 in PBX; Invitrogen, Life Technologies), washed and  
189 counterstained with Hoescht (Sigma-Aldrich, USA, 1  $\mu$ g/ml) before image  
190 acquisition in a ZEISS LSM 800 confocal microscope.

### 191 **RNA *in situ* hybridization**

192 Digoxigenin-labeled antisense *Rp-BicC* RNA probes were synthesized using  
193 the RNA-Dig Labeling kit (Roche). *In situ* hybridization was carried out in 4% PFA  
194 fixed ovaries stored in PBT at 4°C. The ovaries were post-fixed in PBT + fixative  
195 solution (10% PFA in PBS + EGTA- $\text{Na}_2$ ) for 20 min on a rocking platform at room  
196 temperature. The ovaries were washed three times with PBT and digested with  
197 proteinase K (10mg/ml) for 15 min and post fixed as before, following three PBT  
198 washes. A pre-hybridization step was performed for 2 h at 60°C in Hybe (50 %  
199 formamide, 5x SSC, 0.2 mg/ml Sonicated salmon testes DNA, 0.1 mg/ml tRNA,  
200 0.05 mg/ml Heparin, 0.1 % Tween-20) before the addition of the probe and further  
201 incubated overnight at 60°C. The ovaries were rinsed three times with Hybe-B  
202 (50 % formamide, 5x SSC, 0.1 % Tween-20) and then washed in Hybe-C (50 %  
203 formamide, 2x SSC, 0.1 % Tween-20) during 2h at 60°C, and further washed



204 three times with PBT. The hybridized samples were blocked with antibody-  
205 hybridization solution (0.2% Tween-20, 1 mg/ml Bovine Serum Albumin, 5%  
206 Normal Goat Serum) for 3 h at room temperature and then incubated overnight  
207 with alkaline phosphatase-conjugated anti-DIG Fab fragments (Roche, 1: 2,000)  
208 at 4°C on a shaking platform. The antibody was washed away three times with  
209 PBT and one time with alkaline staining buffer (100 mM TRIS, 100 mM NaCl,  
210 0.1% Tween-20). The enzymatic activity revealed with NBT/BCIP (Roche). When  
211 staining was evident, the ovaries were washed in PBT three times to stop the  
212 reaction, dehydrated in a graded series of ethanol and mounted in glycerol for  
213 observation and image acquisition using A1 ZEISS microscope.

#### 214 **Parental RNA interference**

215 Double-stranded RNA (dsRNA) was produced by simultaneous transcription  
216 with T7 RNA polymerase (New England Biolabs) on PCR products containing T7  
217 promoter sequences (CGACTCACTATAGGG) at both ends. Two independent  
218 templates, dsRNA<sup>BicC1</sup> and dsRNA<sup>BicC2</sup> were used for independent experiments  
219 to evaluate potential off-target effects. dsRNA was quantitated and injected into  
220 virgin females, using different concentrations, as described in Lavore et al. [11].  
221 Two days after injection, the females were fed to induce oogenesis and mated  
222 with males. After mating, eggs were collected and ovaries fixed as indicated  
223 above. A negative control was performed injecting virgin females with dsRNA  
224 corresponding to the  $\beta$ -lactamase gene (dsRNA <sup>$\beta$ -lac</sup>) of *Escherichia coli* gene  
225 [11].

226

#### 227 **Results**

##### 228 **The *Rp-BicC* transcript is expressed in ovaries and early embryos**

229 *Rp-BicC* was identified in transcriptomes derived from ovaries, unfertilized  
230 eggs and early embryos of *R. prolixus* (Pascual and Rivera-Pomar, unpublished  
231 data) by sequence similarity search against *D. melanogaster* orthologue. The  
232 assembled *Rp-BicC* transcript from these RNA-seq data set corresponds to the  
233 *ab initio* annotated transcriptional units RPRC0001612 and RPRC001613 within  
234 the supercontig KQ034133, indicating that the two different predictions in Vector  
235 Base were erroneous, and correspond to an only transcriptional unit (**Fig. 1A**).  
236 The transcript (1,986 bp) derives from 14 exons and encodes a predicted  
237 polypeptide of 662 amino acids. Multiple alignment of *BicC* orthologous

238 sequences showed that *Rp-BicC* conserve the typical KH and SAM domains as  
239 other species (**Fig. 1B** and **Fig. S1**).

240 Reads from the *Rp-BicC* transcript were identified in all of the transcriptomes  
241 corresponding to the different stages come from ovaries, unfertilized eggs and  
242 early embryos at 0, 12, 24 and 48 hours post egg-laying (hPL; Pascual and  
243 Rivera-Pomar, unpublished data), indicating that the transcript is maternally  
244 contributed, although the zygotic expression cannot be ruled out. The expression  
245 was assessed by RT-PCR in unfertilized (un), early zygote (0 hPL), blastoderm  
246 (12 hPL), gastrulating germ band (24 hPL) and germ band (48 hPL) eggs. *Rp-*  
247 *BicC* mRNA was detected in all stages analyzed (**Fig. 1B**). *In situ* hybridization  
248 revealed expression of the *Rp-BicC* transcript in ovaries, showing cytoplasmic  
249 distribution in both, the germarium (**Fig. 1D**, arrowhead) and the follicular  
250 epithelium of previtellogenic and vitellogenic oocytes (**Fig. 1D, E**).

#### 251 ***Rp-BicC* is required for proper egg formation**

252 To determine the role of *Rp-BicC*, we injected non-fed virgin females with  
253 different concentrations of two independent dsRNA corresponding to different  
254 regions of the transcript (dsRNA<sup>*BicC1*</sup>, 237 bp and dsRNA<sup>*BicC2*</sup>, 291 bp). As control,  
255 we used dsRNA corresponding to the  $\beta$ -lactamase gene of *E. coli* (dsRNA <sup>$\beta$ -lac</sup>).  
256 After feeding and mating, dsRNA<sup>*Rp-BicC1*</sup>, dsRNA<sup>*BicC2*</sup>, and dsRNA <sup>$\beta$ -lac</sup> injected  
257 females were evaluated for fertility, egg deposition and morphology, and  
258 embryonic and ovary phenotype. The silenced females laid fewer eggs than the  
259 control, suggesting that fertility is compromised (**Table S1**). The eggs were let to  
260 develop for the expected time of embryogenesis to finish (>14 days), but none of  
261 the eggs from interfered females resulted in hatchlings, indicating that the  
262 embryogenesis was affected. Dissection of the eggs showed that they lack any  
263 distinguishable embryonic structure, suggesting that *BicC* might act at very early  
264 stages of development (data not shown).

265 The eggs laid by the silenced females, as opposed to the control ones, were  
266 smaller, with irregular shape and presented white coloration instead of the  
267 characteristic pink (**Fig. 2A**), indicating the absence or significant reduction of the  
268 *Rhodnius heme-binding protein* (RHBP, one important component of the yolk).  
269 The *Rp-BicC* interfered eggs showed an irregular surface. To determine if there  
270 is a structural alteration in the chorion morphology we performed scanning  
271 electron microscopy. Compared to the regular hexagonal pattern of the chorion



272 observed in the control (**Fig. 2B**), the eggs derived from the silenced females  
273 showed defects in the chorion structure, showing an irregular pattern,  
274 prominences, and a shrink surface (**Fig. 2C**). The operculum is deformed,  
275 although it has a similar size as the control ones. This indicates that the chorion  
276 and chorion structures are formed, but the regular patterning is dramatically  
277 affected.

### 278 ***Rp-BicC* is required for the development of follicular epithelium during** 279 **oogenesis**

280 To further investigate the effect of *Rp-BicC*, we studied the morphology of the  
281 ovary. The ovaries of the *Rp-BicC* silenced females have the same number of  
282 ovarioles as the control, but they are reduced in size (**Fig. 3A-F**). We analyzed  
283 the morphology under DIC optics (**Fig. 3B, E**) and by staining the nuclei to  
284 determine cell distribution (**Fig. 3C, F**). Compared to the control (**Fig. 3B**), the  
285 follicular epithelium of the *Rp-BicC* silenced females was folded and wrinkled  
286 (**Fig. 3C**) and both, previtellogenic and vitellogenic oocytes were smaller (**Fig.**  
287 **3B-C**). The ovaries of *Rp-BicC* silenced females did not evidence significant  
288 morphological differences in the germarium, but displayed the absence of the  
289 large nucleoli characteristic of the trophic chamber. From previtellogenic stages  
290 on, we observed that the regular organization of the follicular cells is lost (**Fig.**  
291 **3E, F**). Thin sections of the ovary stained with hematoxylin/eosin showed that, as  
292 compared to the control ones (**Fig. 3D**), silenced females displayed oocytes with  
293 irregular yolk distribution, accompanied by diminished number of yolk granules  
294 and presence of empty spaces in the cytoplasm. The follicular cells appear  
295 detached one from each other and the irregular columnar epithelium showed  
296 increased intercellular space (**Fig. 3H**). Transmission electron microscopy  
297 analysis indicates that, compared to the control (**Fig. 3I**), follicular cells of the *Rp-*  
298 *BicC* silenced females lack their contact with the basal membrane and tunica  
299 propria, reduction of the contacts that keep them together in a regular manner,  
300 and show vesiculated cytoplasm and less dense nucleoli. (**Fig. 3J**). This results  
301 agrees with the observed phenotype of the chorion and indicate that the follicular  
302 cells are able to form the chorion, despite the disarray of the cells.

### 303 ***Rp-BicC* affect the polarity and vesicle trafficking of follicle cells**

304 In order to address the functional characterization of the morphological  
305 changes observed in the follicular epithelium, we analyzed whether the yolk

306 uptake and the polarity of the follicular cells were affected. We used an antibody  
307 to localize the presence of vitellin in the developing oocytes. In control females,  
308 we observed that vitellogenic oocytes accumulates vitellin in the follicle cells (**Fig.**  
309 **4A-C**). The ovaries of silenced females, compared to the control, showed a  
310 dramatic decrease of the anti-vitellin signal (**Fig. 4D-F**). A closer look showed that  
311 vitellin was concentrated in granules in the apical region of the follicle cells (**Fig.**  
312 **4G**), while in the silenced females very few granules could be accounted and the  
313 signal amount was lower (**Fig. 4H**). We hypothesis that a decreased amount of  
314 vitellin in the cell, although we can not rule out a dispersed localization in the  
315 silenced females. One reason of this might be that the loading of the vitellin by  
316 the follicle cells is affected. Therefore, we used a lipophilic styryl dye to mark cell  
317 membrane and nascent endosomes that spread into the cytoplasm. In the ovaries  
318 of control females, we observed defined fluorescent signal in the apical and basal  
319 poles of the follicle cells indicating *bona fide* regions of endo and exocytosis (**Fig.**  
320 **4I-K**). In the ovaries of *Rp-BicC* silenced females, the fluorescence could only be  
321 detected in the membrane in apical pole (**Fig. 4L-M**). This suggests that the  
322 polarity of the follicular epithelium is compromised and, therefore, it might affect  
323 the interaction of the follicle cells with the developing oocyte. As we have shown  
324 before, the accumulation of yolk drops in the ovaries of *Rp-BicC* silenced females,  
325 thus we conclude that the lack of a fully functional endo/exocytic pathway might  
326 affects the transport of vitellin to the oocyte. We hypothesized that if the  
327 endo/exocytic pathway is affected, there should be a general defect in the  
328 transport of molecules from the haemolymph to the oocyte through the follicle  
329 cells. To test this, we injected fluorescent dextran (MW 10 kDa) in the abdominal  
330 cavity of both, control and silenced females, and analyzed the differences in the  
331 uploading of the dextran. In control females, the vitellogenic oocytes accumulates  
332 fluorescent dextran (**Fig. 5A**; the general morphology of the ovariole is shown by  
333 Hoescht staining in **Fig. 5B**), while the vitellogenic oocytes of the *Rp-BicC*  
334 silenced females shows a dramatic reduction of fluorescence (**Fig. 5C**;  
335 morphology in **Fig. 5D**). Taken together our results supports the notion that the  
336 lack of *Rp-BicC* affects the transport through the follicular epithelium in the ovary.

337

338 **Discussion**

339 *R. prolixus* has been a model system for many essential issues in biology, but  
340 the understanding of the molecular mechanisms had to wait until the sequencing  
341 of the genome [13]. The physiology of *R. prolixus* has been studied since the  
342 pioneering work of Vincent Wigglesworth [61,62]. The oogenesis of *R. prolixus* is  
343 one of the best studied among insects, from the morphological work of Huebner  
344 [22,24-26,34,63] to the biochemistry studies of Masuda [64-70]. Although studies  
345 on the cellular biology of oogenesis have recently emerged [71,72], we still lack  
346 enough information on genetic to understand the molecular basis of egg  
347 formation and patterning in *R. prolixus*. This is the first report on the function of  
348 *Rp-BicC* in *R. prolixus* to provide a *bona fide* mechanism for egg formation.

349 In *D. melanogaster*, *BicC* is a maternal gene affecting embryonic anterior-  
350 posterior polarity, with a wide range of defects in segmentation [43,44]. We could  
351 not identify any embryonic structures in the eggs derived from *Rp-BicC* silenced  
352 females, as we have observed also for other maternal genes (Pagola, Pascual,  
353 and Rivera Pomar, unpublished data). This indicates that the role for *Rp-BicC* in  
354 embryogenesis, if any, has to be prior to gastrulation. Our results share  
355 similarities with the description of the *BicC* orthologue phenotype in the  
356 hemipteran *Nilaparvata lugens*, which seems to affect yolk loading in the egg [73].  
357 Here we provide a plausible working hypothesis for the phenotype of *BicC* in the  
358 process, related to epithelial polarity as evidenced by the changes of distribution  
359 of endocytic pathway markers [74]. The physiology and biochemistry of yolk  
360 metabolism is well known in *R. prolixus* [41], however, the molecular and cellular  
361 mechanisms of egg formation and yolk accumulation are still scarce. It has been  
362 recently demonstrated that *Rp-ATG6* and *Rp-ATG8*, part of PI3P-kinase  
363 complexes that regulate the endocytic and autophagy machinery, are essential  
364 for yolk accumulation [71,72]. The phenotype of silenced *Rp-ATG6* females  
365 shares similarities with the one of *Rp-BicC*: unviable, small and white eggs that  
366 accumulate a minor fraction of yolk. However, *Rp-ATG6* seems to affect the  
367 oocyte uptake of yolk rather than the follicular cells, as they did not show defects  
368 in egg's chorion. On the other hand, *Rp-ATG8* is required for the maternal  
369 biogenesis of autophagosomes and its role, although not exclusive, in follicular  
370 atresia. These results on the autophagocytic pathway and the ones presented  
371 here, point to common pathways affected by different genes at different levels.

372 Based on the expression of *Rp-BicC* in follicle cells and the distribution of  
373 vitellin and membrane markers in the silenced females, we support the idea that  
374 *Rp-BicC* affects the polarity of the follicular epithelium and, likely, the oocyte-  
375 follicle cell interaction. Cell-to-cell interactions are crucial for the development of  
376 oogenesis via proper yolk deposition and signaling from the follicle cell to the  
377 oocyte to establish embryonic polarity, the latter an aspect unknown in *R. prolixus*  
378 and worth to be further investigated. This suggests a conserved role for *BicC*.  
379 *Bicc1* (the mouse homologue of *BicC*) is required for E-cadherin-based cell-cell  
380 adhesion, indicating that that lack of *Bicc1* disrupts normal cell-cell junctions, and,  
381 in consequence, alter epithelial polarity [75].

382 Disruption of *BicC* in *D. melanogaster* affects the normal migration direction of  
383 the anterior follicle cell of the oocytes [46]. We observed that the primary effect  
384 of silencing *Rp-BicC* is a disorganized pattern of the follicular epithelium from the  
385 early previtellogenic stages until the end of vitellogenesis. At a first glance, the  
386 phenotype might be related to atresia. However, atresia, which can occur in any  
387 stage of oogenesis [35], results in a non-viable oocyte in which chorion deposition  
388 does not occur. The silenced *Rp-BicC* ovaries shows some characteristics of the  
389 atresia, such as the lack of a consistent perivitelline space between follicle cells,  
390 however, the follicle cells eventually produce the chorion. Although we cannot  
391 rule out that diminished egg production in the *Rp-BicC* silenced females is the  
392 consequence of increased atresia, the observation that all dissected ovaries  
393 showed the same atresic-like morphology in all oocytes, lead us to support the  
394 idea that atresia is not the main event. This differentiate the *Rp-BicC* phenotype  
395 from the *Rp-ATG6* and *Rp-ATG8* ones, although it requires further studies on the  
396 regulation of the different components of the pathways to shed light to the  
397 process. Interestingly, *BicC* has been described as a conserved translational  
398 regulator in animals and the available evidence indicates that it regulates many  
399 cellular processes [reviewed in 76].

400 New and exciting works on *R. prolixus* molecular and cellular mechanisms of  
401 oogenesis have open unexplored paths to understand the genetic and, therefore,  
402 the molecular interactions that regulate the formation of the egg. There is a  
403 challenge ahead for a more comprehensive understanding of the process of  
404 oogenesis in hemimetabolous insects. Deeper knowledge on this basic process  
405 in a vector of one of the most important disease in Latin America will pave the

406 road to the design of new ways to control the population of the vector by affecting  
407 fertility.

408

409

## 410 **Acknowledgements**

411 The authors thank all members of Rivera-Pomar and Andrés Lavore labs for  
412 fruitful discussions, L. Canavoso (CIBICI –CCT CONICET, Córdoba, Argentina)  
413 for kindly sharing the anti-vitellin antibody, A. Nazar for her contribution to develop  
414 the *in situ* protocol for *R. prolixus*, and Reprosemyx S.A. for kindly allowing the  
415 use of their confocal facility.

416

## 417 **References**

- 418 1. Coura JR, Borges-Pereira J (2012) Chagas disease. What is known and what should  
419 be improved: a systemic review. *Rev Soc Bras Med Trop* 45: 286-296.
- 420 2. Chagas CRJ (1909) Nova tripanosomíase humana. Estudos sobre a morfologia e o  
421 ciclo evolutivo do *Schizotrypanum cruzi* n. gen. n. esp., agente da nova entidade  
422 mórbida do homem. *Mem Inst Oswaldo Cruz* 1: 159–218.
- 423 3. OMS (2019) Chagas disease (American trypanosomiasis). <http://www.who.int/>.
- 424 4. Büning Jr (1994) The insect ovary : ultrastructure, previtellogenic growth, and  
425 evolution. London ; New York: Chapman & Hall. x, 400 p. p.
- 426 5. Mitchell RD, 3rd, Sonenshine DE, Perez de Leon AA (2019) Vitellogenin Receptor as  
427 a Target for Tick Control: A Mini-Review. *Front Physiol* 10: 618.
- 428 6. Wigglesworth VB (1964) The hormonal regularion of growth and reproduction in  
429 insects. *Adv Insect Physiol* 2.
- 430 7. Wigglesworth VB (1953) The origin of sensory neurons in an insect. *Q J Microscopy*  
431 *Sci* 93: 93-112.
- 432 8. Wigglesworth VB (1934) The physiology of ecdysis in *Rhodnius prolixus* (Hemiptera).  
433 II. Factors controlling moulting and metamorphosis. *Q J Microscopy Sci* 77: 191-  
434 222.
- 435 9. Wigglesworth VB (1939) *The Principles of Insect Physiology*. Methuen, London.
- 436 10. Berni M, Fontenele MR, Tobias-Santos V, Caceres-Rodrigues A, Mury FB, et al.  
437 (2014) Toll signals regulate dorsal-ventral patterning and anterior-posterior  
438 placement of the embryo in the hemipteran *Rhodnius prolixus*. *Evodevo* 5: 38.
- 439 11. Lavore A, Pagola L, Esponda-Behrens N, Rivera-Pomar R (2012) The gap gene  
440 giant of *Rhodnius prolixus* is maternally expressed and required for proper head  
441 and abdomen formation. *Dev Biol* 361: 147-155.
- 442 12. Lavore A, Esponda-Behrens N, Pagola L, Rivera-Pomar R (2014) The gap gene  
443 *Kruppel* of *Rhodnius prolixus* is required for segmentation and for repression of  
444 the homeotic gene *sex comb-reduced*. *Dev Biol* 387: 121-129.
- 445 13. Mesquita RD, Vionette-Amaral RJ, Lowenberger C, Rivera-Pomar R, Monteiro FA,  
446 et al. (2015) Genome of *Rhodnius prolixus*, an insect vector of Chagas disease,  
447 reveals unique adaptations to hematophagy and parasite infection. *Proc Natl*  
448 *Acad Sci U S A* 112: 14936-14941.
- 449 14. Medeiros MN, Logullo R, Ramos IB, Sorgine MH, Paiva-Silva GO, et al. (2011)  
450 Transcriptome and gene expression profile of ovarian follicle tissue of the  
451 triatomine bug *Rhodnius prolixus*. *Insect Biochem Mol Biol* 41: 823-831.



- 452 15. Ribeiro JM, Genta FA, Sorgine MH, Logullo R, Mesquita RD, et al. (2014) An insight  
453 into the transcriptome of the digestive tract of the bloodsucking bug, *Rhodnius*  
454 *prolixus*. *PLoS Negl Trop Dis* 8: e2594.
- 455 16. Lynch JA, Roth S (2011) The evolution of dorsal-ventral patterning mechanisms in  
456 insects. *Genes Dev* 25: 107-118.
- 457 17. Snodgrass RE (1935) Principles of insect morphology. New York, London,: McGraw-  
458 Hill Book Company, inc. ix, 667 p. p.
- 459 18. Bonhag PF (1958) Ovarian structure and vitellogenesis in insects. *Ann Rev Ent* 3.
- 460 19. Davey KG (1965) Reproduction in the insects. San Francisco,: W.H. Freeman. x, 96  
461 p. p.
- 462 20. Urbani E (1970) A survey on some aspects of oogenesis in *Dytiscus*, *Cybister* and  
463 *Hygrobia* (Coleoptera). *Acta Embryol Exp (Palermo)* 3: 281-297.
- 464 21. de Cuevas M (2005) *Drosophila* Oogenesis. eLS: 1-7.
- 465 22. Lutz DA, Huebner E (1980) Development and cellular differentiation of an insect  
466 telotrophic ovary (*Rhodnius prolixus*). *Tissue Cell* 12: 773-794.
- 467 23. Huebner E, Injeyan H (1981) Follicular modulation during oocyte development in an  
468 insect: formation and modification of septate and gap junctions. *Dev Biol* 83: 101-  
469 113.
- 470 24. Huebner E, Anderson E (1972) A cytological study of the ovary of *Rhodnius prolixus*.  
471 Cytoarchitecture and development of the trophic chamber. *J Morphol* 138: 1-40.
- 472 25. Huebner E, Anderson E (1972) A cytological study of the ovary of *Rhodnius prolixus*.  
473 II. Oocyte differentiation. *J Morphol* 137: 385-415.
- 474 26. Huebner E, Anderson E (1972) A cytological study of the ovary of *Rhodnius prolixus*.  
475 I. The ontogeny of the follicular epithelium. *J Morphol* 136: 459-493.
- 476 27. Fortes P, Salvador G, Consoli FL (2011) Ovary development and maturation in  
477 *Nezara viridula* (L.) (Hemiptera: Pentatomidae). *Neotrop Entomol* 40: 89-96.
- 478 28. Nusslein-Volhard C, Roth S (1989) Axis determination in insect embryos. *Ciba Found*  
479 *Symp* 144: 37-55; discussion 55-64, 92-38.
- 480 29. Driever W, Nusslein-Volhard C (1988) The bicoid protein determines position in the  
481 *Drosophila* embryo in a concentration-dependent manner. *Cell* 54: 95-104.
- 482 30. Driever W, Nusslein-Volhard C (1988) A gradient of bicoid protein in *Drosophila*  
483 embryos. *Cell* 54: 83-93.
- 484 31. Schupbach T, Roth S (1994) Dorsoventral patterning in *Drosophila* oogenesis. *Curr*  
485 *Opin Genet Dev* 4: 502-507.
- 486 32. Roth S, Schupbach T (1994) The relationship between ovarian and embryonic  
487 dorsoventral patterning in *Drosophila*. *Development* 120: 2245-2257.
- 488 33. Schupbach T, Wieschaus E (1986) Maternal-effect mutations altering the anterior-  
489 posterior pattern of the *Drosophila* embryo. *Roux Arch Dev Biol* 195: 302-317.
- 490 34. Huebner E (1981) Nurse cell-oocyte interaction in the telotrophic ovarioles of an  
491 insect, *Rhodnius prolixus*. *Tissue Cell* 13: 105-125.
- 492 35. Huebner E (1981) Oocyte-follicle cell interaction during normal oogenesis and atresia  
493 in an insect. *J Ultrastruct Res* 74: 95-104.
- 494 36. Valdimarsson G, Huebner E (1989) The development of microtubular arrays in the  
495 germ tissue of an insect telotrophic ovary. *Tissue Cell* 21: 123-138.
- 496 37. Harrison RE, Huebner E (1997) Unipolar microtubule array is directly involved in  
497 nurse cell-oocyte transport. *Cell Motil Cytoskeleton* 36: 355-362.
- 498 38. Melo AC, Valle D, Machado EA, Salerno AP, Paiva-Silva GO, et al. (2000) Synthesis  
499 of vitellogenin by the follicle cells of *Rhodnius prolixus*. *Insect Biochem Mol Biol*  
500 30: 549-557.
- 501 39. Raikhel AS (2005) Vitellogenesis of disease vectors, from physiology to genes. In:  
502 Marquardt W, editor. *Biology of Disease Vectors*. Elsevier Academic Press,  
503 London, UK.
- 504 40. Beament JW (1946) The formation and structure of the chorion of the egg in an  
505 hemipteran, *Rhodnius prolixus*. *Q J Microsc Sci* 87: 393-439.



- 506 41. Atella GC, Gondim KC, Machado EA, Medeiros MN, Silva-Neto MA, et al. (2005)  
507 Oogenesis and egg development in triatomines: a biochemical approach. *An*  
508 *Acad Bras Cienc* 77: 405-430.
- 509 42. Pascual A (2019) *Genómica del desarrollo embrionario de Rhodnius prolixus*  
510 [Doctoral]. SeDiCi: UNLP. 180 p.
- 511 43. Mohler J, Wieschaus EF (1986) Dominant maternal-effect mutations of *Drosophila*  
512 *melanogaster* causing the production of double-abdomen embryos. *Genetics*  
513 112: 803-822.
- 514 44. Nusslein-Volhard C (1977) Genetic analysis of pattern-formation in the embryo  
515 of *Drosophila melanogaster* : Characterization of the maternal-effect  
516 mutant *Bicaudal*. *Wilehm Roux Arch Dev Biol* 183: 249-268.
- 517 45. Schupbach T, Wieschaus E (1991) Female sterile mutations on the second  
518 chromosome of *Drosophila melanogaster*. II. Mutations blocking oogenesis or  
519 altering egg morphology. *Genetics* 129: 1119-1136.
- 520 46. Mahone M, Saffman EE, Lasko PF (1995) Localized *Bicaudal-C* RNA encodes a  
521 protein containing a KH domain, the RNA binding motif of FMR1. *EMBO J* 14:  
522 2043-2055.
- 523 47. Chmiel NH, Rio DC, Doudna JA (2006) Distinct contributions of KH domains to  
524 substrate binding affinity of *Drosophila* P-element somatic inhibitor protein. *RNA*  
525 12: 283-291.
- 526 48. Aviv T, Lin Z, Ben-Ari G, Smibert CA, Sicheri F (2006) Sequence-specific recognition  
527 of RNA hairpins by the SAM domain of Vts1p. *Nat Struct Mol Biol* 13: 168-176.
- 528 49. Johnson PE, Donaldson LW (2006) RNA recognition by the Vts1p SAM domain. *Nat*  
529 *Struct Mol Biol* 13: 177-178.
- 530 50. Chicoine J, Benoit P, Gamberi C, Paliouras M, Simonelig M, et al. (2007) *Bicaudal-*  
531 *C* recruits CCR4-NOT deadenylase to target mRNAs and regulates oogenesis,  
532 cytoskeletal organization, and its own expression. *Dev Cell* 13: 691-704.
- 533 51. Gamberi C, Hipfner DR, Trudel M, Lubell WD (2017) *Bicaudal C* mutation causes  
534 *myc* and TOR pathway up-regulation and polycystic kidney disease-like  
535 phenotypes in *Drosophila*. *PLoS Genet* 13: e1006694.
- 536 52. Stothard P (2000) The sequence manipulation suite: JavaScript programs for  
537 analyzing and formatting protein and DNA sequences. *Biotechniques* 28: 1102,  
538 1104.
- 539 53. Rozen S, Skaletsky H (2000) Primer3 on the WWW for general users and for biologist  
540 programmers. *Methods Mol Biol* 132: 365-386.
- 541 54. Wanderley-Teixeira V, Teixeira AA, Cunha FM, Costa MK, Veiga AF, et al. (2006)  
542 Histological description of the midgut and the pyloric valve of *Tropidacris collaris*  
543 (Stoll, 1813) (Orthoptera: Romaleidae). *Braz J Biol* 66.
- 544 55. Huebner E, Anderson E (1970) The effects of vinblastine sulfate on the microtubular  
545 organization of the ovary of *Rhodnius prolixus*. *J Cell Biol* 46: 191-198.
- 546 56. Reynolds ES (1963) The use of lead citrate at high pH as an electron-opaque stain  
547 in electron microscopy. *J Cell Biol* 17: 208-212.
- 548 57. Smith CB, Betz WJ (1996) Simultaneous independent measurement of endocytosis  
549 and exocytosis. *Nature* 380: 531-534.
- 550 58. Sorrivas de Lozano V, Morales A, Yañez MJ (2014) Principios y práctica de la  
551 Microscopía Electrónica. In: UAT E, editor. CONICET Bahía Blanca.
- 552 59. Blariza MJ, Leyria J, Canavoso LE, Soria NW, Garcia BA (2016) Dynamics of  
553 expression of two vitellogenin genes in the Chagas' disease vector *Triatoma*  
554 *infestans*: Analysis throughout pre-vitellogenesis and vitellogenesis. *Acta Trop*  
555 156: 100-107.
- 556 60. Aguirre SA, Frede S, Rubiolo ER, Canavoso LE (2008) Vitellogenesis in the  
557 hematophagous *Dipetalogaster maxima* (Hemiptera: Reduviidae), a vector of  
558 Chagas' disease. *J Insect Physiol* 54: 393-402.

- 559 61. Wigglesworth VB (1936) The function of corpus allatum in the growth and  
560 reproduction of *R. prolixus* (Hemiptera). Quarterly Journal of Microscopic Science  
561 79: 91-121.
- 562 62. Davey KG (1987) Inputs to the hormonal control of egg development in *Rhodnius*  
563 *prolixus*. Mem Inst Oswaldo Cruz 82 Suppl 3: 103-108.
- 564 63. Lutz DA, Huebner E (1981) Development of nurse cell-oocyte interactions in the  
565 insect telotrophic ovary (*Rhodnius prolixus*). Tissue Cell 13: 321-335.
- 566 64. Bouts DM, Melo AC, Andrade AL, Silva-Neto MA, Paiva-Silva Gde O, et al. (2007)  
567 Biochemical properties of the major proteins from *Rhodnius prolixus* eggshell.  
568 Insect Biochem Mol Biol 37: 1207-1221.
- 569 65. Machado EA, Atella GC, Gondim KC, de Souza W, Masuda H (1996)  
570 Characterization and immunocytochemical localization of lipophorin binding sites  
571 in the oocytes of *Rhodnius prolixus*. Arch Insect Biochem Physiol 31: 185-196.
- 572 66. Braz GR, Abreu L, Masuda H, Oliveira PL (2001) Heme biosynthesis and oogenesis  
573 in the blood-sucking bug, *Rhodnius prolixus*. Insect Biochem Mol Biol 31: 359-  
574 364.
- 575 67. Coelho HS, Atella GC, Moreira MF, Gondim KC, Masuda H (1997) Lipophorin density  
576 variation during oogenesis on *Rhodnius prolixus*. Arch Insect Biochem Physiol  
577 35: 301-313.
- 578 68. Gondim KC, de Oliveira PL, Masuda H (1987) The roles of haemolymphatic  
579 lipoproteins in the oogenesis of *Rhodnius prolixus*. Mem Inst Oswaldo Cruz 82  
580 Suppl 3: 89-92.
- 581 69. Machado EA, Oliveira PL, Moreira MF, de Souza W, Masuda H (1998) Uptake of  
582 *Rhodnius* heme-binding protein (RHBP) by the ovary of *Rhodnius prolixus*. Arch  
583 Insect Biochem Physiol 39: 133-143.
- 584 70. Costa-Filho A, Werneck CC, Nasciutti LE, Masuda H, Atella GC, et al. (2001)  
585 Sulfated glycosaminoglycans from ovary of *Rhodnius prolixus*. Insect Biochem  
586 Mol Biol 31: 31-40.
- 587 71. Vieira PH, Bomfim L, Atella GC, Masuda H, Ramos I (2018) Silencing of RpATG6  
588 impaired the yolk accumulation and the biogenesis of the yolk organelles in the  
589 insect vector *R. prolixus*. PLoS Negl Trop Dis 12: e0006507.
- 590 72. Pereira J, Diogo C, Fonseca A, Bomfim L, Cardoso P, et al. (2020) Silencing of  
591 RpATG8 impairs the biogenesis of maternal autophagosomes in vitellogenic  
592 oocytes, but does not interrupt follicular atresia in the insect vector *Rhodnius*  
593 *prolixus*. PLoS Negl Trop Dis 14: e0008012.
- 594 73. Zhang BX, Huang HJ, Yu B, Lou YH, Fan HW, et al. (2015) Bicaudal-C plays a vital  
595 role in oogenesis in *Nilaparvata lugens* (Hemiptera: Delphacidae). J Insect  
596 Physiol 79: 19-26.
- 597 74. Gaffield MA, Tabares L, Betz WJ (2009) Preferred sites of exocytosis and  
598 endocytosis colocalize during high- but not lower-frequency stimulation in mouse  
599 motor nerve terminals. J Neurosci 29: 15308-15316.
- 600 75. Park S, Blaser S, Marchal MA, Houston DW, Sheets MD (2016) A gradient of  
601 maternal Bicaudal-C controls vertebrate embryogenesis via translational  
602 repression of mRNAs encoding cell fate regulators. Development 143: 864-871.
- 603 76. Gamberi C, Lasko P (2012) The Bic-C family of developmental translational  
604 regulators. Comp Funct Genomics 2012: 141386.
- 605 77. Larkin MA, Blackshields G, Brown NP, Chenna R, McGettigan PA, et al. (2007)  
606 Clustal W and Clustal X version 2.0. Bioinformatics 23: 2947-2948.

607

## 608 **Supporting information**

609 **Fig S1. Multiple alignment of *BicC* orthologues.** Clustal W [77] was used to  
610 align sequences extracted from NCBI sequence database *Harpegnathos saltator*

611 (gi|749730745 - gi|749730739-X1), *Bombus terrestris* (gi|808147069), *Apis florea*  
612 (gi|820865347), *Megachile rotundata* (gi|805824678), *Acromyrmex echinator*  
613 (gi|332022439), *Tribolium castaneum* (gi|91089717), *Pediculus humanus*  
614 (gi|242009357), *Drosophila melanogaster* (gi|24584541 and NP\_723949.1), *Mus*  
615 *musculus* (AAK27347.1), *Nilaparvata lugens* [73], *Danio rerio* (NP\_981965.1),  
616 *Xenopus laevis* (NP\_001081996.1). The amino acid conservation is visualized  
617 with black blocks, the amino acid group level conservation with gray blocks. The  
618 dashes show the absence of sequence aligned along the alignment. Oblique lines  
619 refer to continuity of alignment.

620 **Table S1: Parental RNAi experimental data.**

621

## 622 **Figure legends**

623 **Fig 1. Structure and expression of *R. prolixus* *Bicaudal C* (*Rp-BicC*). (A)**

624 Scheme of the gene structure. Grey bar represents the supercontig that contains  
625 the *Rp-BicC* transcriptional unit. Light gray boxes represent exons. (B) Diagram  
626 of the predicted conserved functional domains of *BicC* in *R. prolixus* and *D.*  
627 *melanogaster* domains. (C) Detection of *Rp-BicC* transcript in the ovarioles by *in*  
628 *situ* hybridization. The arrowhead indicates the expression in distal part of the  
629 tropharium, the arrow indicates the expression in the vitellogenic oocyte. Scale  
630 Bar: 100  $\mu$ m. (D) Different focal plane of the vitellogenic oocyte showed in C. Note  
631 the expression of *Rp-BicC* in the follicular cells. (E) Detection of *BicC* transcript  
632 by RT-PCR at different developmental, unfertilized eggs (un), 0, 12, 24, 48 hours  
633 post egg-laying (hPL). Upper panel, *Rp-BicC*, lower panel, *Rp-actin*.

634

635 **Fig 2. Silencing of *Rp-BicC* results in defective chorion formation. (A)**

636 Eggs from control (upper row) and silenced (lower row) females observed with a  
637 dissecting microscope. Note the smaller size and the lack of the characteristic  
638 pigmentation of the eggs from silenced females. (B) Scanning Electron  
639 Microscopy image of a control egg. (C) Scanning Electron Microscopy image of  
640 an egg from interfered female. Scale bar: 500  $\mu$ m. Op, operculum, it corresponds  
641 to the anterior pole of the egg.

642

643 **Fig 3. Silencing of *Rp-BicC* affects the ovary morphology.** (A) Ovary  
644 morphology of a control female under dissecting microscope. (B-C) Ovariole of a  
645 control female showing the tropharium (Tr) and a previtellogenic (Pv) and  
646 vitellogenic (V) oocytes by differential interference contrast microscopy (B) and  
647 nuclei distribution by Hoescht staining (C); Scale bar: 200  $\mu$ m. (D) Ovary  
648 morphology of a RNAi<sup>BicC</sup> female under dissecting microscope. Note the smaller  
649 size of the ovarioles and the lack of pigmentation. (E-F) Ovariole of a silenced  
650 female showing the tropharium (Tr), a previtellogenic (Pv) and vitellogenic (V)  
651 oocytes by differential interference contrast microscopy (E) and nuclei distribution  
652 by Hoescht staining (F); Scale bar: 200  $\mu$ m. Note that the smaller size of the  
653 previtellogenic oocyte and the disarray of nuclear distribution of the follicular cells.  
654 (G) Histological staining (Haematoxylin-Eosin) of a vitellogenic oocyte from  
655 control females; Scale bar: 10  $\mu$ m. FC, follicular cells. Y, yolk. (I). Transmission  
656 electron microscopy (TEM) of a previtellogenic oocyte from control females;  
657 Scale bar: 2  $\mu$ m. TP: Tunica propria. Nu: Nucleolus. (H) Histological section  
658 (Haematoxylin-Eosin staining) of a vitellogenic oocyte from interfered females;  
659 Scale bar: 10  $\mu$ m. Note the space between follicular cells and the inhomogeneous  
660 distribution of yolk. (J) Transmission electron microscopy (TEM) of a  
661 previtellogenic oocyte from silenced females; Scale bar: 2  $\mu$ m. The asterisk  
662 marks the intercellular space Intercellular spaces.

663

664 **Fig 4. Silencing of *Rp-BicC* alter vitellin and lipid distribution in**  
665 **vitellogenic oocytes.** (A-C) Immunostaining using anti-vitellin antibody to  
666 determine distribution of vitellin (visualized in red) in the oocytes of control  
667 females. (D-F) Immunostaining using anti-vitellin antibody to determine  
668 distribution of vitellin (visualized in red) in the oocytes of RNAi<sup>BicC</sup> females. All  
669 samples were counterstained with Hoescht (blue). Scale bar: 50  $\mu$ m. (G)  
670 Confocal optical section of anti-vitellin immunostained follicular cells from control  
671 females. (H) Confocal optical section of anti-vitellin immunostained follicular cells  
672 from silenced (RNAi<sup>BicC</sup>) females. Scale bar: 10  $\mu$ m. (I-K) Distribution of the FM  
673 4-64FX probe in oocytes after injection of control females. (L-N) Distribution of  
674 the FM4-64FX probe in oocytes after injection of silenced (RNAi<sup>BicC</sup>) females.  
675 Hoescht (I, L, in blue) visualizes DNA; FM 4-64FX (J, M, in red) stain membranes  
676 and endocytic vesicles. Scale bar: 50  $\mu$ m.

677

678 **Fig 5. *In vivo* dextran uptake in oocytes is prevented in RNAi<sup>BicC</sup> females.**

679 (A) Distribution of Texas Red-labeled dextran in vitellogenic oocytes from control

680 females. Tropharium (Tr), Previtellogenic oocyte (Pv), Vitellogenic oocyte (V).

681 Exposure time: 50 msec. (B) Counterstaining of control with Hoescht. (C)

682 Distribution of Texas Red-labeled dextran in vitellogenic oocytes from silenced

683 (RNAi<sup>BicC</sup>) females. Exposure time: 100 msec. (D) Hoescht counterstaining of C.

684 Due to the large size of the ovarioles of *R. prolixus*, some of them might be

685 squashed by the coverslip after mounting resulting in breaking of the follicular

686 epithelia which is not dependent on the interference experiment. Scale bar: 50

687  $\mu\text{m}$ .

688



Figure 2

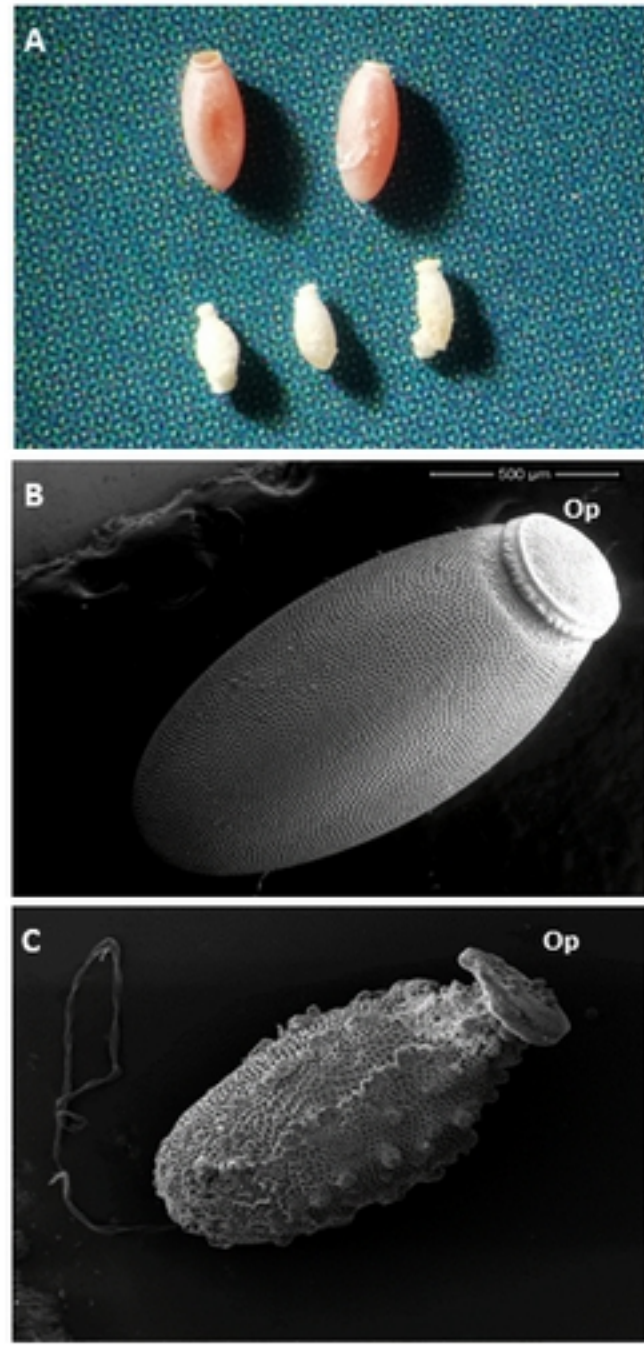

Figure2



Figure 3

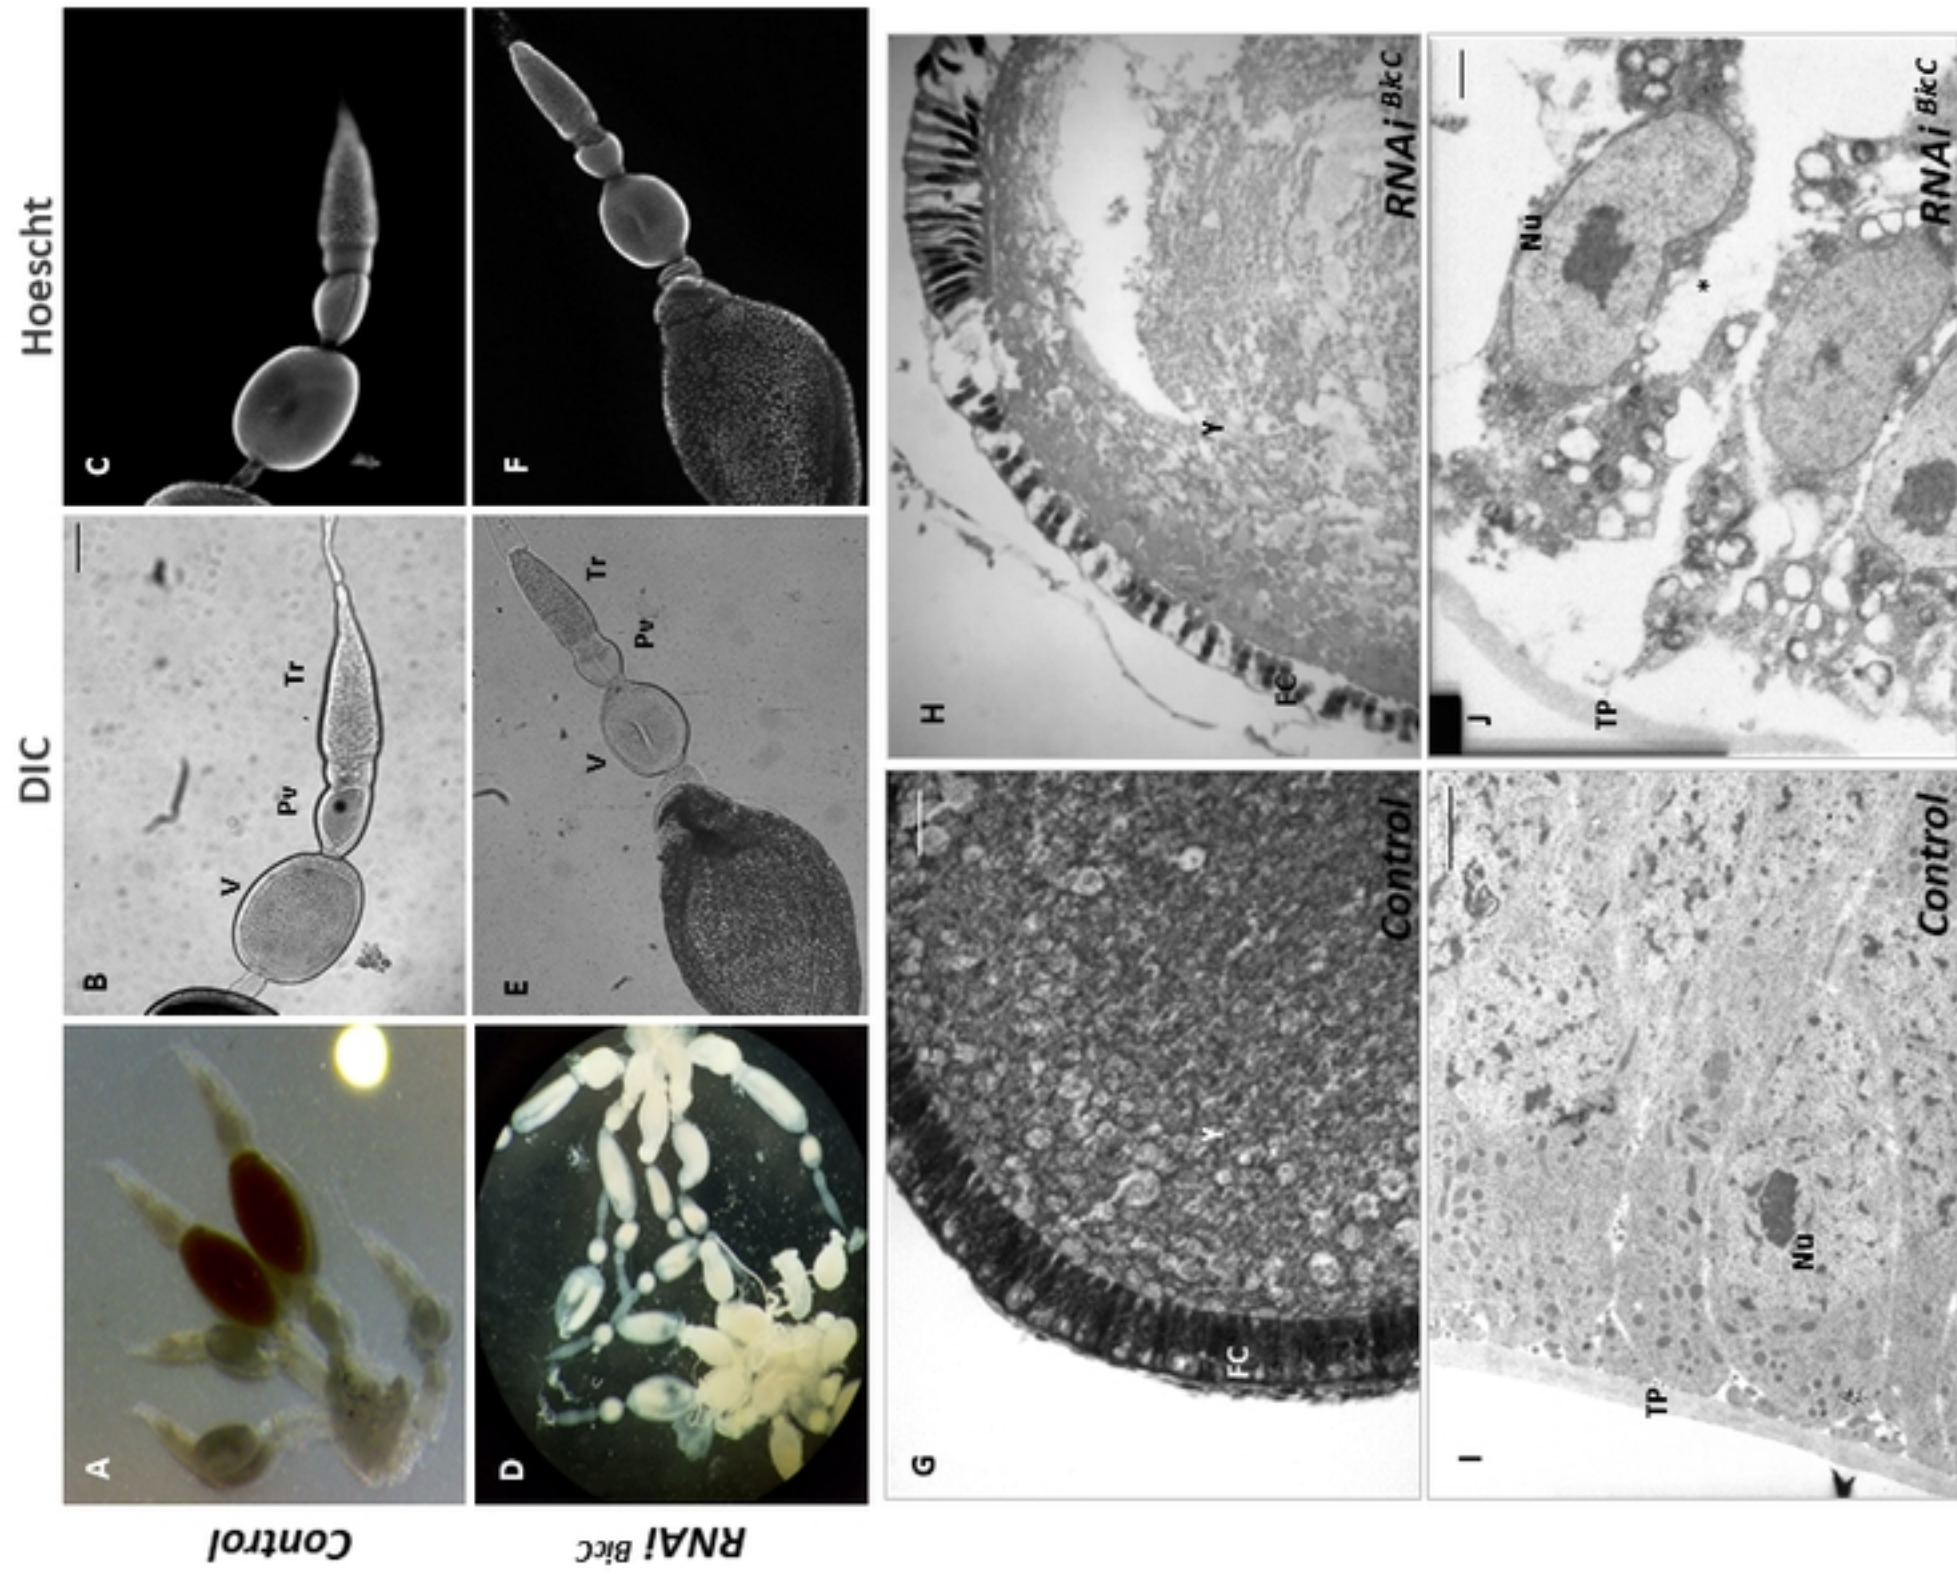

Figure3

Figure 4

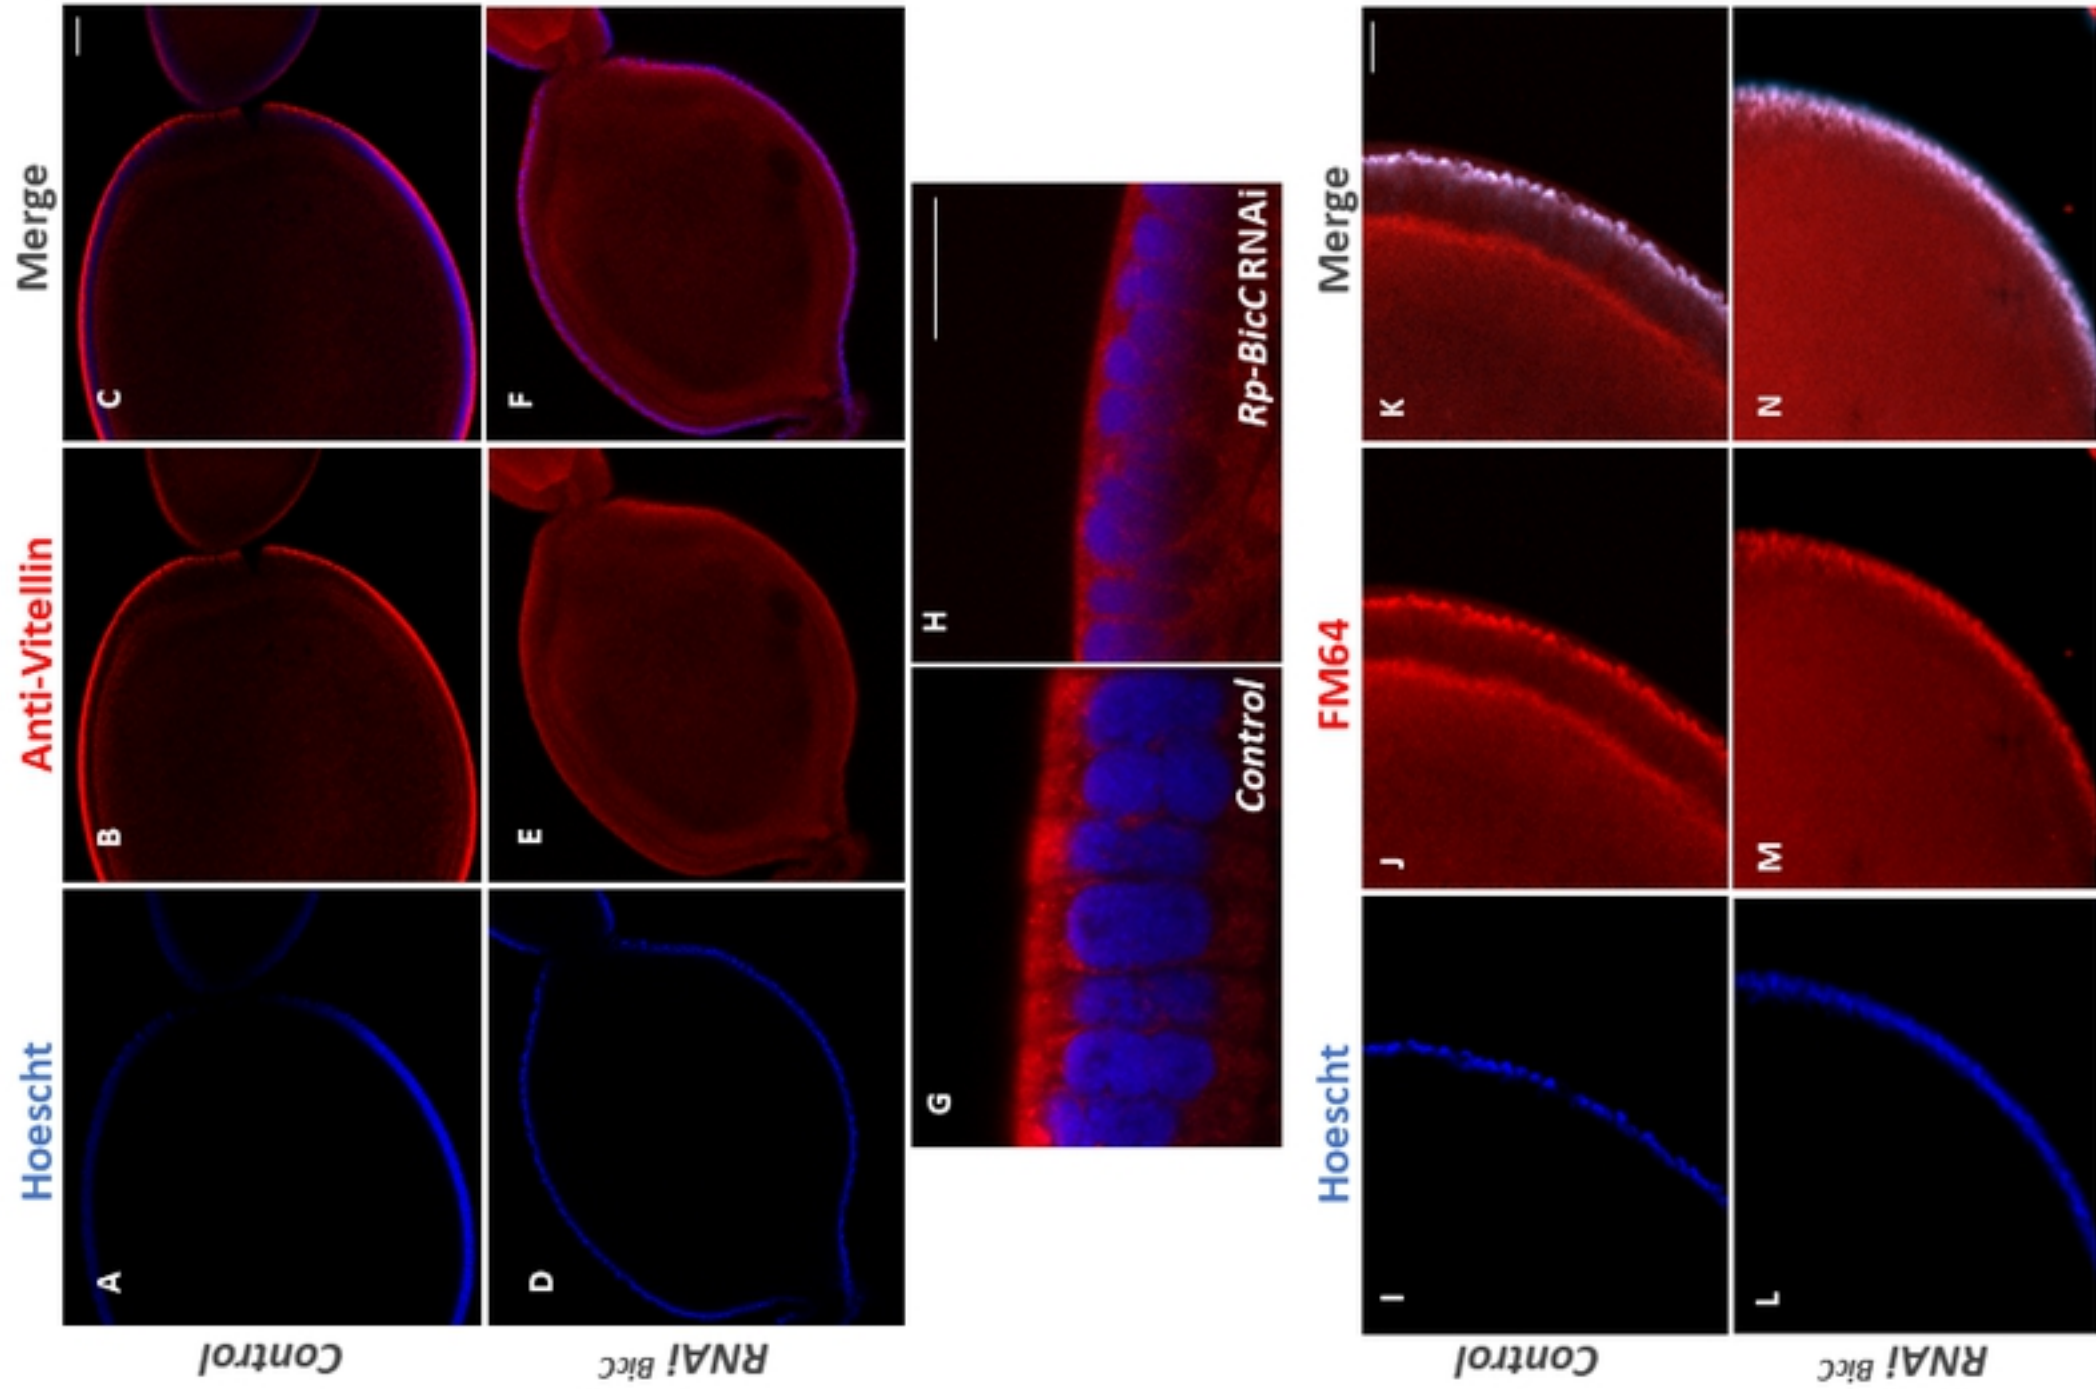

Figure4

Figure 5

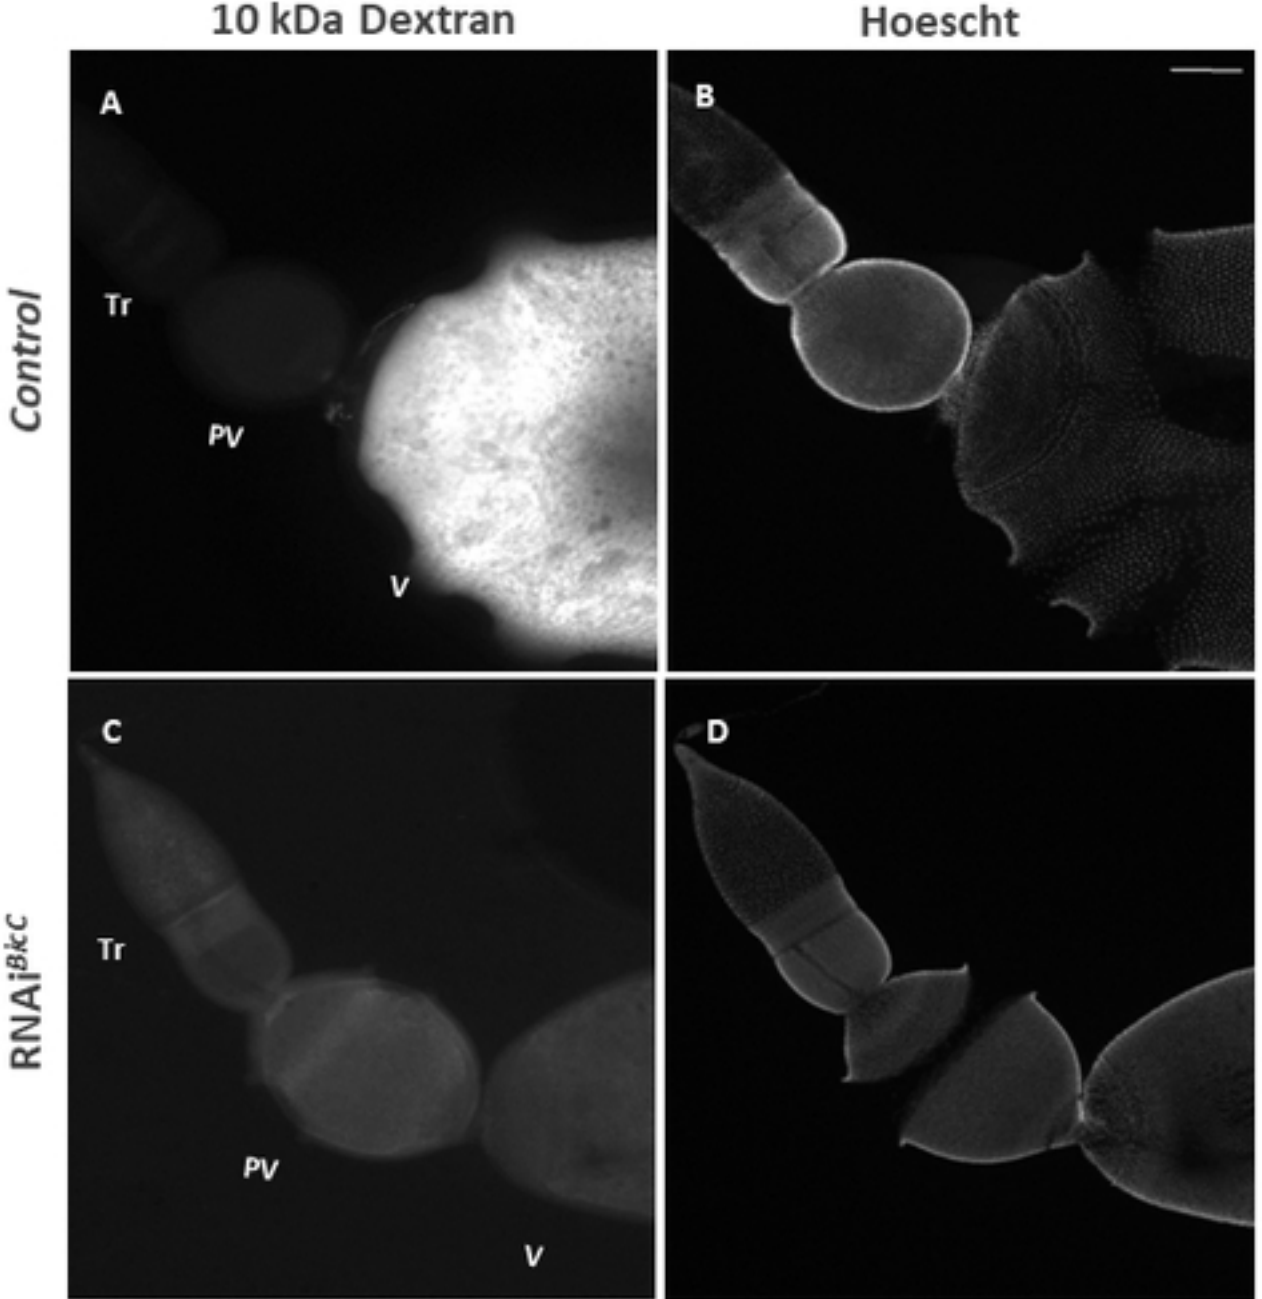

Figure5



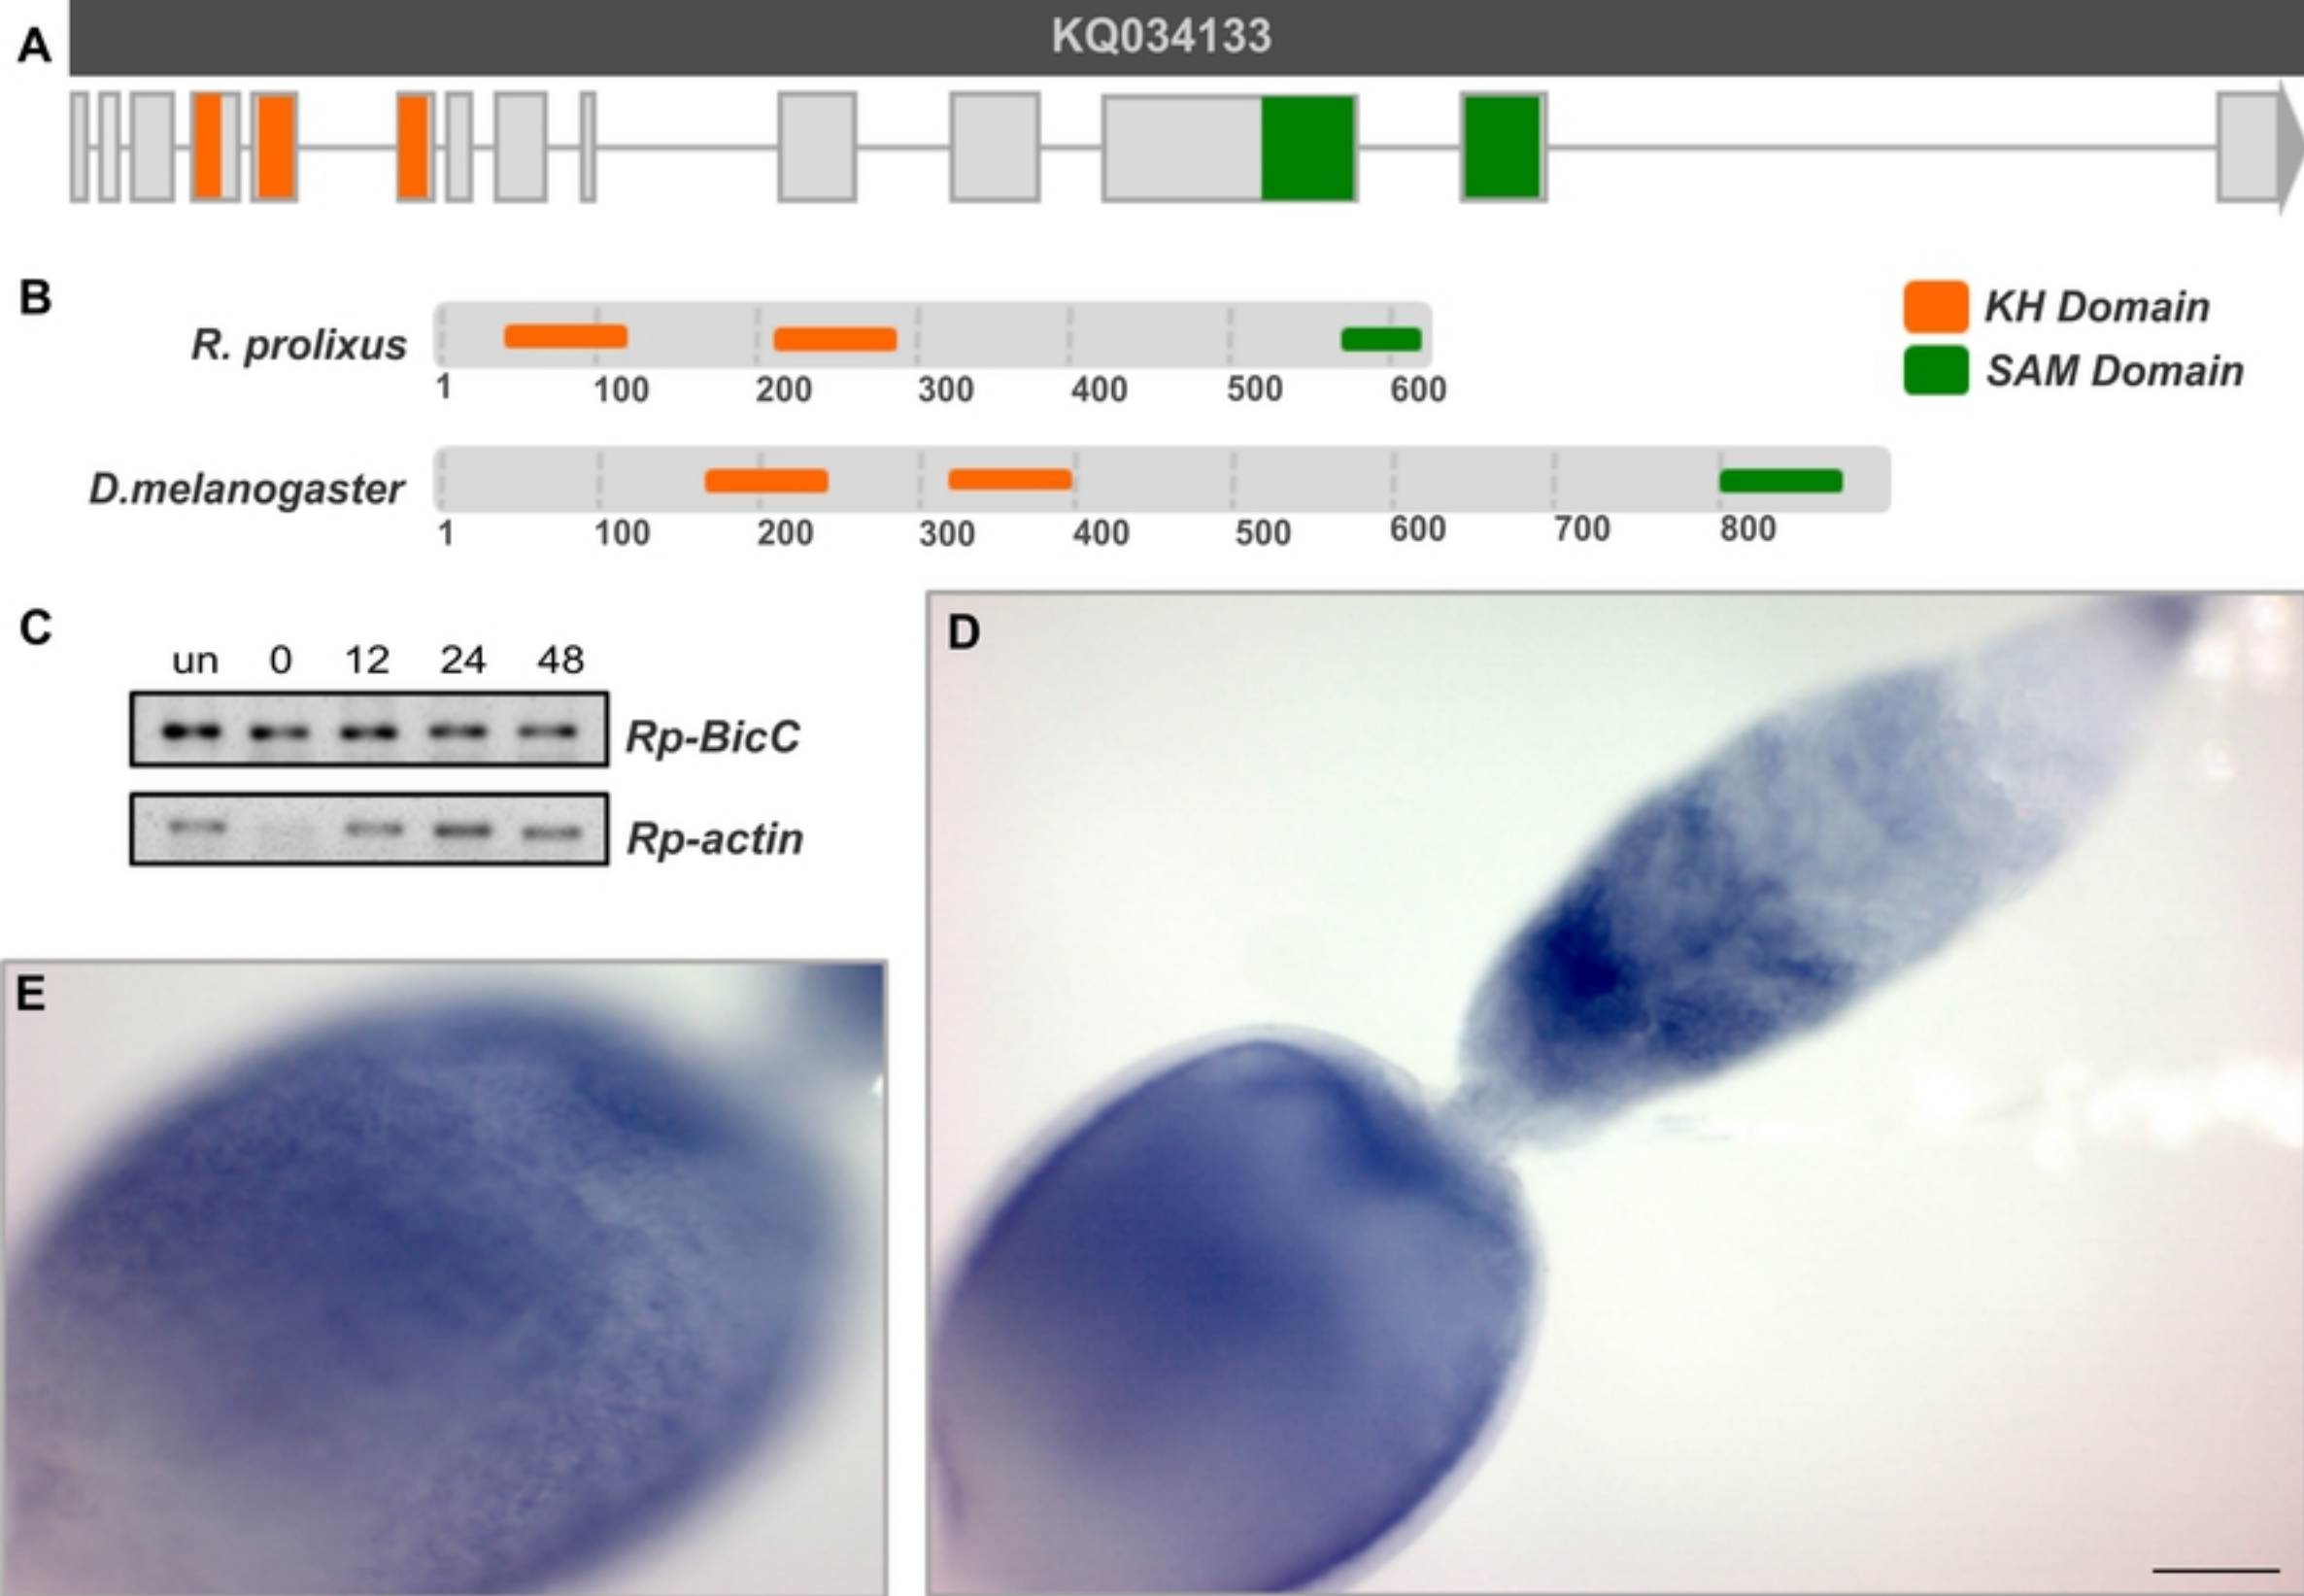

Figure 1
